# Supplementary material for: Dynamic change of serum CA19–9 levels in benign and malignant patients with obstructive jaundice after biliary drainage and new correction formulas
Source: PubMed Central journal article supplement (PMC8105938; doi:10.1186/s12885-021-08204-w), 2021-05-07

**Pancreatic cancer (n=44)**

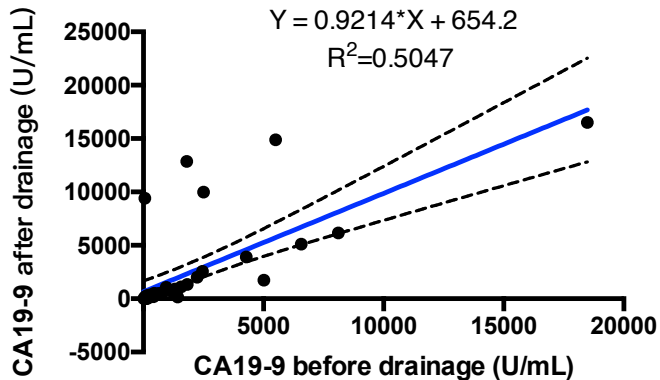

**Periampullary cancer (n=16)**

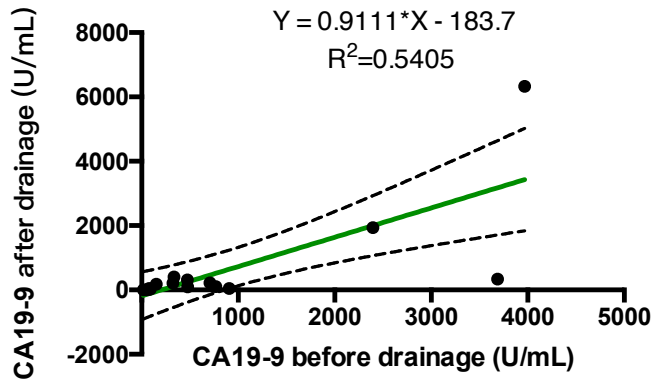

**Bile duct cancer (n=31)**

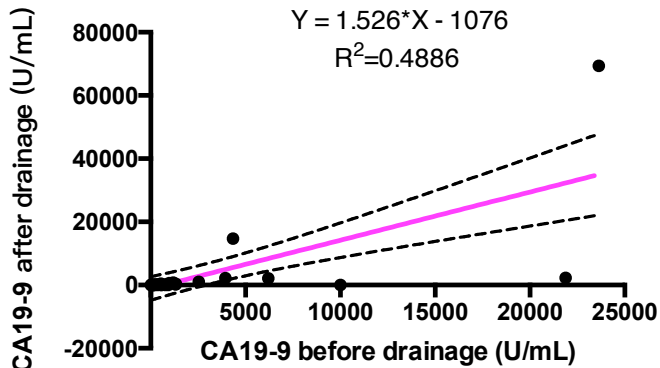

**Other types of cancers (n=11)**

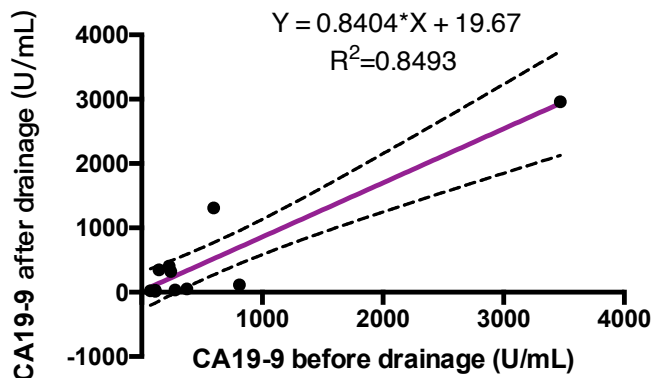

Supplement: 12885_2021_8204_MOESM1_ESM.pdf [file 12885_2021_8204_MOESM1_ESM.pdf]
